# Supplementary material for: Ultrafine Co-Species Interspersed g-C3N4 Nanosheets and Graphene as an Efficient Polysulfide Barrier to Enable High Performance Li-S Batteries
Source: MDPI journal article supplement (doi:10.3390/molecules28020588), 2023-01-06
Supplement: s1 [file s1]

# Ultrafine Co-species nanodots interspersed g-C<sub>3</sub>N<sub>4</sub> nanosheets and graphene as an efficient polysulfides barrier to enable enhanced Li-S batteries

Shanxing Wang<sup>1,2</sup>, Xinye Liu<sup>2</sup>, Yuanfu Deng<sup>2,3\*</sup>

<sup>1</sup> School of Chemistry and Materials Engineering, Huizhou University, Huizhou, 516007, China;

<sup>2</sup> The Key Laboratory of Fuel Cell Technology of Guangdong Province, School of Chemistry and Chemical Engineering, South China University of Technology, Guangzhou, China;

<sup>3</sup> Electrochemical Energy Engineering Research Center of Guangdong Province, South China University of Technology, Guangzhou, 510640, China;

E-mail address: chyfdeng@scut.edu.cn

**Keywords:** Co-species nanodots; g-C<sub>3</sub>N<sub>4</sub> and graphene; Polysulfides barrier; Chemical adsorption; Catalytic conversion

### **Figures and Tables captions:**

Figure S1. TG curve of S/KB composite.

Figure S2. (a) XRD pattern in the appointed region of CoO@G sample. (b) N<sub>2</sub> adsorption-desorption curve of pure g-C<sub>3</sub>N<sub>4</sub>.

Figure S3. FE-SEM images of (a) g-C<sub>3</sub>N<sub>4</sub>, (b) Co@g-C<sub>3</sub>N<sub>4</sub>/G precursor, (c, d) g-C<sub>3</sub>N<sub>4</sub>/G sample.

Figure S4. XPS survey spectra of pure g-C<sub>3</sub>N<sub>4</sub> sample.

Figure S5. Charge-discharge profiles of Li-S cells with the Co@g-C<sub>3</sub>N<sub>4</sub>/G-PP based separators.

Table S1. Textural parameters of the corresponding samples.

Table S2. Electrochemical performance comparisons of Co@g-C<sub>3</sub>N<sub>4</sub>/G interlayer with other relevant interlayers in recent literatures.

Figure S1

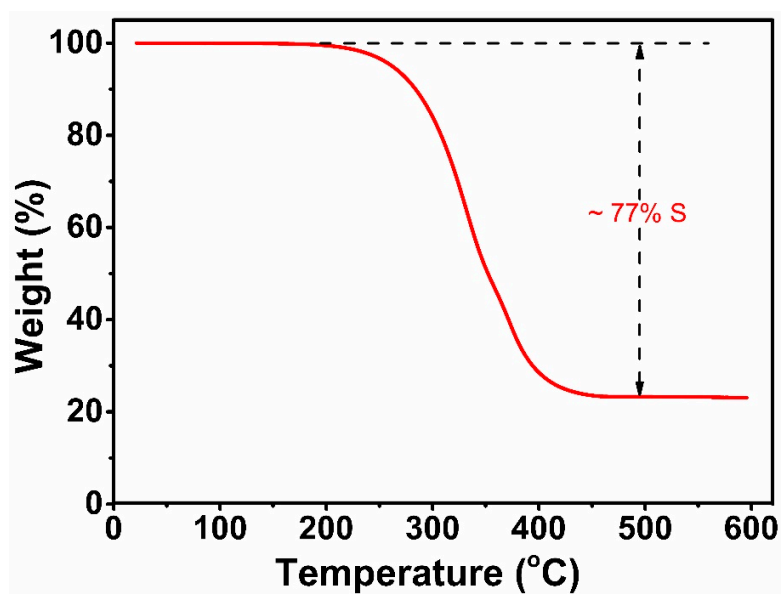

Figure S2

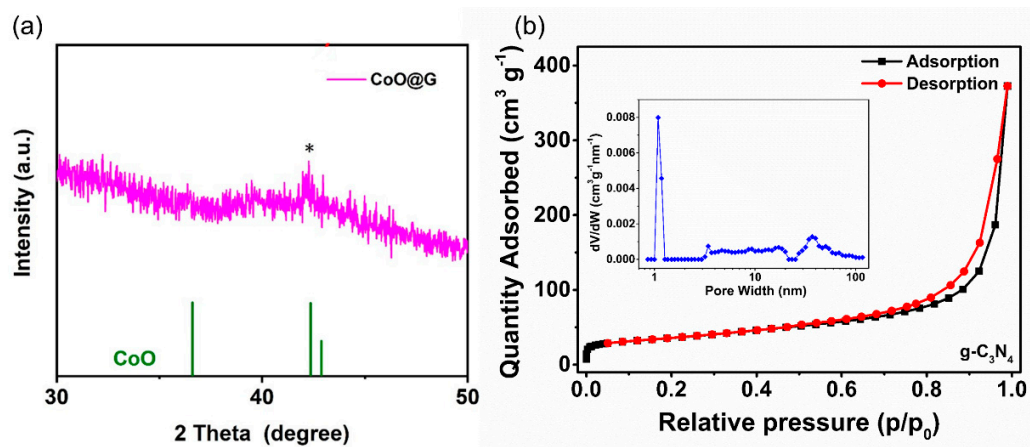

Figure S3

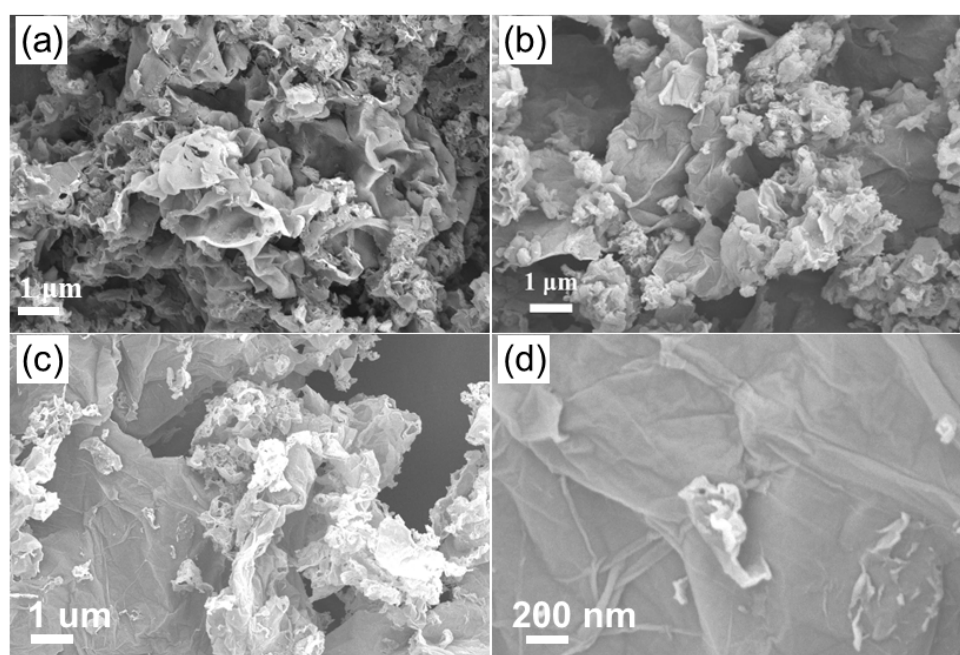

Figure S4

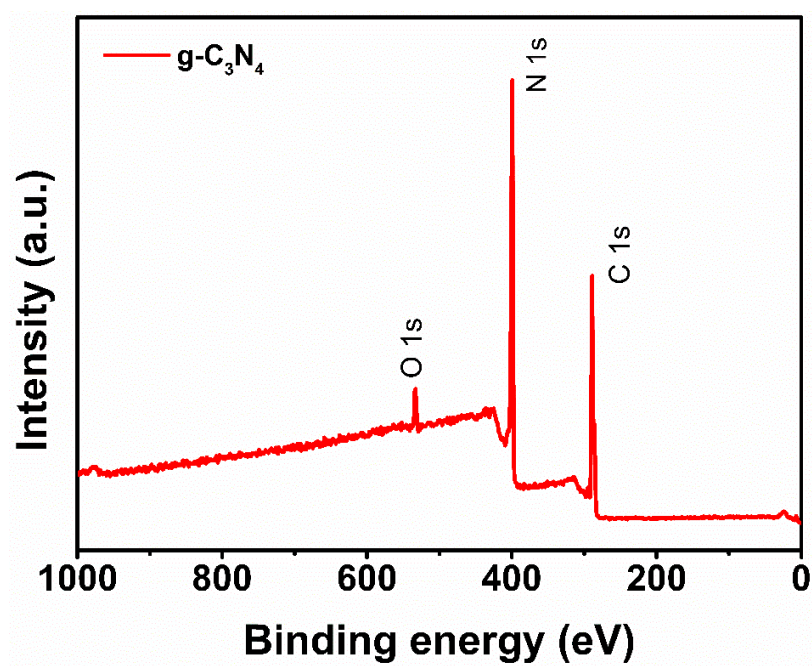

Figure S5

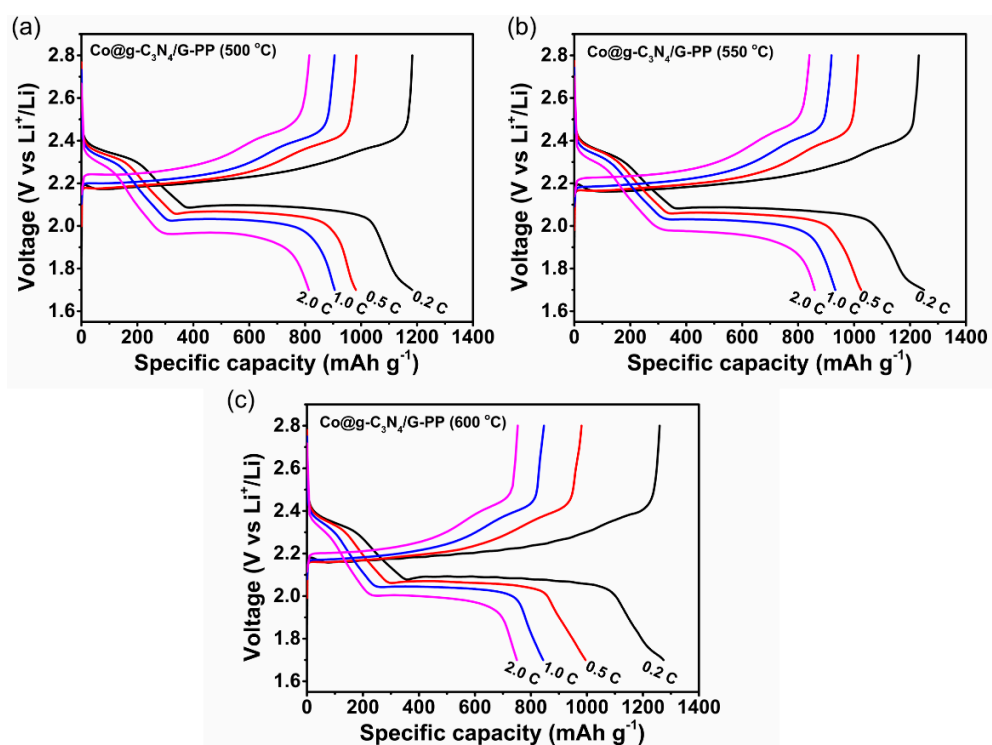

Table S1

| <b>Elements<br/>Samples</b>              | <b>C</b> | <b>N</b> | <b>O</b> | <b>Co</b> |
|------------------------------------------|----------|----------|----------|-----------|
| <b>g-C<sub>3</sub>N<sub>4</sub></b>      | 18.94 %  | 75.02 %  | 6.04 %   | –         |
| <b>g-C<sub>3</sub>N<sub>4</sub>/G</b>    | 83.9 %   | 8.7 %    | 7.4 %    | –         |
| <b>Co@g-C<sub>3</sub>N<sub>4</sub>/G</b> | 83.08 %  | 7.12 %   | 8.43%    | 1.37 %    |



Table S2

| Materials                                                                               | Sulfur final content<br>in cathode | Sulfur coating<br>(mg/cm <sup>2</sup> ) | Interlayer coating<br>(mg/cm <sup>2</sup> ) | Electrochemical performance<br>(mAh/g)                                                                                                                                                                             |
|-----------------------------------------------------------------------------------------|------------------------------------|-----------------------------------------|---------------------------------------------|--------------------------------------------------------------------------------------------------------------------------------------------------------------------------------------------------------------------|
| <b>Co@g-C<sub>3</sub>N<sub>4</sub>/G<br/>(This work)</b>                                | 70 wt%                             | 1.3-1.5                                 | 0.2                                         | <b>785 after 100 cycles at 0.2 C (3.0 mg/cm<sup>2</sup>)</b><br><b>657 after 400 cycles at 1.0 C (0.067 %)</b><br><b>815 after 350 cycles at 0.5 C (0.035 %)</b><br><b>928 after 250 cycles at 0.2 C (0.043 %)</b> |
| g-C <sub>3</sub> N <sub>4</sub> /CNT <sup>[S1]</sup>                                    | 60 wt%                             | 1.4                                     | 0.45                                        | 870 after 100 cycles at 0.2 C (0.112 %)<br>800 after 500 cycles at 1.0 C (0.030 %)                                                                                                                                 |
| G@g-C <sub>3</sub> N <sub>4</sub> /C/KB <sup>[S2]</sup>                                 | 72 wt%                             | 1.0                                     | 0.35                                        | 770 after 100 cycles at 0.2 C (0.230 %)<br>475 after 800 cycles at 1.0 C (0.050 %)                                                                                                                                 |
| MnCo <sub>2</sub> O <sub>4.5</sub> @g-C <sub>3</sub> N <sub>4</sub> /AB <sup>[S3]</sup> | 63 wt%                             | 1.3-1,4                                 | -                                           | 791 after 100 cycles at 0.2 C (0.250 %)<br>632 after 400 cycles at 0.5 C (0.096 %)<br>553 after 500 cycles at 2.0 C (0.032 %)                                                                                      |
| Co-CN/Super P <sup>[S4]</sup>                                                           | 60 wt%                             | 1.0                                     | 0.3                                         | 640 after 250 cycles at 2.0 C (0.020 %)<br>719 after 100 cycles at 0.2 C (3.0 mg/cm <sup>2</sup> )                                                                                                                 |
| g-C <sub>3</sub> N <sub>4-x</sub> /CNT <sup>[S5]</sup>                                  | 58.6 wt%                           | -                                       | -                                           | 755 after 100 cycles at 0.2 C (0.310 %)<br>567 after 500 cycles at 1.0 C (0.067 %)                                                                                                                                 |
| CoS@g-C <sub>3</sub> N <sub>4</sub> /KB <sup>[S6]</sup>                                 | 70 wt%                             | 1.3-1.5                                 | 0.07                                        | 600 after 250 cycles at 0.1 C (4.0 mg/cm <sup>2</sup> )<br>572 after 500 cycles at 1.0 C (0.03%)                                                                                                                   |
| Ni-C <sub>3</sub> N <sub>4</sub> /C <sup>[S7]</sup>                                     | 64 wt%                             | 2.8                                     | 0.5                                         | 893 after 300 cycles at 0.3 C (0.035%)                                                                                                                                                                             |
| FeOOH/C <sub>3</sub> N <sub>4</sub> /KB <sup>[S8]</sup>                                 | 64 wt%                             | 1.2-1.5                                 | 0.6                                         | 444 after 900 cycles at 1.0 C (0.055 %)<br>570 after 500 cycles at 1.0 C (0.080 %)                                                                                                                                 |
| N-C-Co film <sup>[S9]</sup>                                                             | 60 wt%                             | 1.5                                     | 0.24                                        | 660 after 250 cycles at 1.0 C (0.101 %)<br>735 after 250 cycles at 1.0 C (0.133 %)                                                                                                                                 |
| BCN/CB <sup>[S10]</sup>                                                                 | 52.5 wt%                           | 1.2                                     | 0.5-0.6                                     | 553 after 500 cycles at 1.0 C (0.090 %)<br>760 after 300 cycles at 0.5 C (0.110 %)                                                                                                                                 |

## References

- S1. Wang, X.L.; Li, G.R.; Li, M.J.; Liu, R.P.; Li, H.B.; Li, T.Y.; Sun, M.Z.; Deng, Y.R.; Feng, M.; Chen, Z.W. Reinforced polysulfide barrier by g-C<sub>3</sub>N<sub>4</sub>/CNT composite towards superior lithium-sulfur batteries. *J. Energy Chem.* **2021**, *53*, 234–240.
- S2. Zhang, H.j.; Liu, Q.Z.; Ruan, S.J.; Ma, C.; Jia, X.F.; Qiao, W.M.; Ling, L.C.; Wang, J.T. In-situ construction of g-C<sub>3</sub>N<sub>4</sub>/carbon heterostructure on graphene nanosheet: An efficient polysulfide barrier for advanced lithium-sulfur batteries. *Appl. Surf. Sci.* **2022**, *578*, 152022.
- S3. Sun, W.H.; Lu, Y.-C.; Huang, Y.Q. An effective sulfur conversion catalyst based on MnCo<sub>2</sub>O<sub>4.5</sub> modified graphitized carbon nitride nanosheets for high-performance Li-S batteries. *J. Mater. Chem. A* **2021**, *9*, 21184–21196.
- S4. Luo, M.; Bai, Y.; Sun, R.; Wang, Z.H.; Sun, W.; Lin, P.; Dai, X.; Sun, K.N. Enhanced performance of lithium-sulfur batteries with Co-doped g-C<sub>3</sub>N<sub>4</sub> nanosheet-based separator. *Ind. Eng. Chem. Res.* **2021**, *60*, 1231–12405.
- S5. Ma, H.; Song, C.L.; Liu, N.; Zhao, Y.; Bakenov, Z. Nitrogen-deficient graphitic carbon nitride/carbon nanotube as polysulfide barrier of high-performance lithium-sulfur batteries. *ChemElectroChem* **2020**, *7*, 4906–4912.
- S6. Liu, X.Y.; Wang, S.X.; Duan, H.H.; Deng, Y.F.; Chen, G.H. A thin and multifunctional CoS@g-C<sub>3</sub>N<sub>4</sub>/Ketjen black interlayer deposited on polypropylene separator for boosting the performance of lithium-sulfur batteries. *J. Colloid Interf. Sci.* **2022**, *1*, 470–481.
- S7. Chen, M.F.; Zhao, X.M.; Li, Y.F.; Zeng, P.; Liu, H.; Yu, H.; Wu, M.; Li, Z.H.; Shao, D.S.; Miao, C.Q.; Chen, G.R.; Shu, H.B.; Pei, Y.; Wang, X.Y. Kinetically elevated redox conversion of polysulfides of lithium-sulfur battery using a separator modified with transition metals coordinated g-C<sub>3</sub>N<sub>4</sub> with carbon-conjugated. *Chem. Eng. J.* **2020**, *385*, 123905–123916.
- S8. Wang, Y.; Yang, L.W.; Chen, Y.X.; Li, Q.; Chen, C.T.; Zhong, B.H.; Guo, X.D.; Wu, Z.G.; Wang, G.K. Novel bifunctional separator with a self-assembled FeOOH/coated g-C<sub>3</sub>N<sub>4</sub>/KB bilayer in lithium-sulfur batteries. *ACS Appl. Mater. Inter.* **2020**, *12*, 57859–57869.
- S9. Wang, J.N.; Wu, T.; Zhang, S.P.; Gu, S.; Jin, J.; Wen, Z.Y. Metal-organic-framework-derived N-C-

Co film as a shuttle-suppressing interlayer for lithium sulfur battery. *Chem. Eng. J.* **2018**, *334*, 2356.

- S10. Jiang, R.J.; Jiang, M.; Huang, Z.Y.; Wang, J.; Kuang, Y.F.; Fu, C.P. Constructing light-weight polar boron-doped carbon nitride nanosheets with increased active sites and conductivity for high performance lithium-sulfur batteries. *Int. J. Hydrogen. Energ.* **2020**, *45*, 14940–14952.
